# Supplementary material
Source: HighWire-hosted journal article supplement (https://ard.bmj.com/content/ard-2024-225872)

**Supplemental Figure 2: Precision-Recall curves for hold-out validation.** Precision-Recall curves for models AP1\_mu, AP1\_bi, AP5\_mu, AP5\_bi, AP5\_top5\_mu and AP5\_top5\_bi, validated on the hold-out set. The predicted classes were determined by assigning the class with the highest predicted probability as the outcome, rather than applying a specific probability threshold.

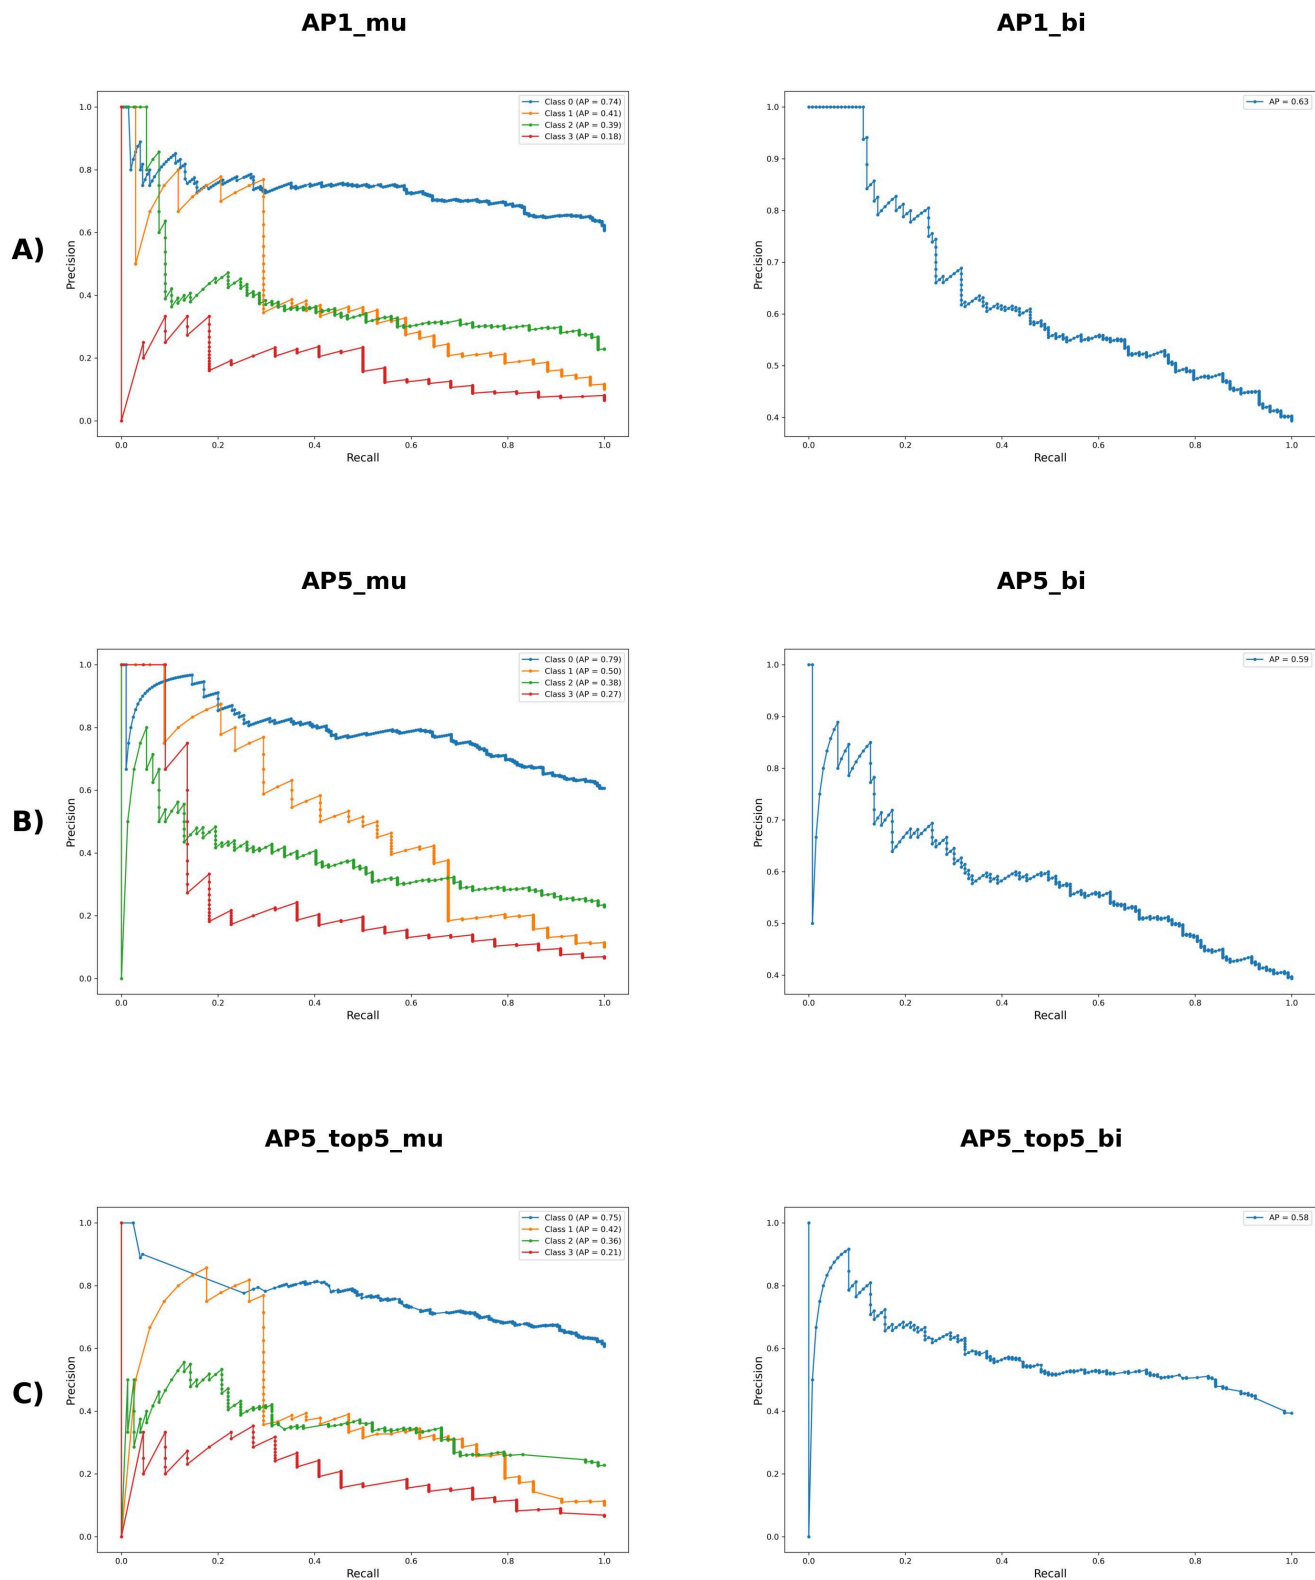

Supplement: inline-supplementary-material-7 [file inline-supplementary-material-7.pdf]
