# Supplementary material
Source: HighWire-hosted journal article supplement (https://ard.bmj.com/content/ard-2024-225872)
Supplement: inline-supplementary-material-9 [file inline-supplementary-material-9.pdf]

**Supplemental Table 6: Demographic characteristics of the POMA dataset used for validation**

This table provides a breakdown of the demographic characteristics among the POMA population, on which external validation of our streamlined models was conducted.

| Characteristics            | External validation set |
|----------------------------|-------------------------|
| <b>Number of instances</b> | 705                     |
| <b>Sex:</b>                |                         |
| Male                       | 281 (39.9%)             |
| Female                     | 424 (60.1%)             |
| <b>Age (years):</b>        |                         |
| Range                      | 45 – 79                 |
| Median                     | 61                      |
| <b>Ethnicity:</b>          |                         |
| Asian                      | 6 (0.9%)                |
| Black or African American  | 106 (15.0%)             |
| White or Caucasian         | 581 (82.4%)             |
| Other Non-White            | 12 (1.7%)               |
| <b>Baseline KLG:</b>       |                         |
| KLG 0                      | 165 (23.4%)             |
| KLG 1                      | 232 (32.9%)             |
| KLG 2                      | 87 (12.3%)              |
| KLG 3                      | 114 (16.2%)             |
| KLG 4                      | 107 (15.2%)             |
| <b>Clinical Outcomes:</b>  |                         |
| Class 0                    | 414 (58.7%)             |
| Class 1                    | 40 (5.7%)               |
| Class 2                    | 207 (29.4%)             |
| Class 3                    | 44 (6.2%)               |
