# Supplementary material
Source: HighWire-hosted journal article supplement (https://ard.bmj.com/content/ard-2024-225872)

**Supplemental Figure 15: Assessment of feature impact on BINARY predictions for FEMALE patients in the hold-out set.** Assessment of feature impact on non-progression (Class 0) and progression (Class 1), using “Kernel-SHAP” for binary predictions with model AP5\_bi. **Left and Middle** – impact distribution of the most important features for Class 0 (Left) and Class 1 (Middle). The colour represents the feature value (red = high, blue = low). A positive SHAP value represents a positive impact on class prediction. **Right** – average impact magnitude of the most important features on class prediction.

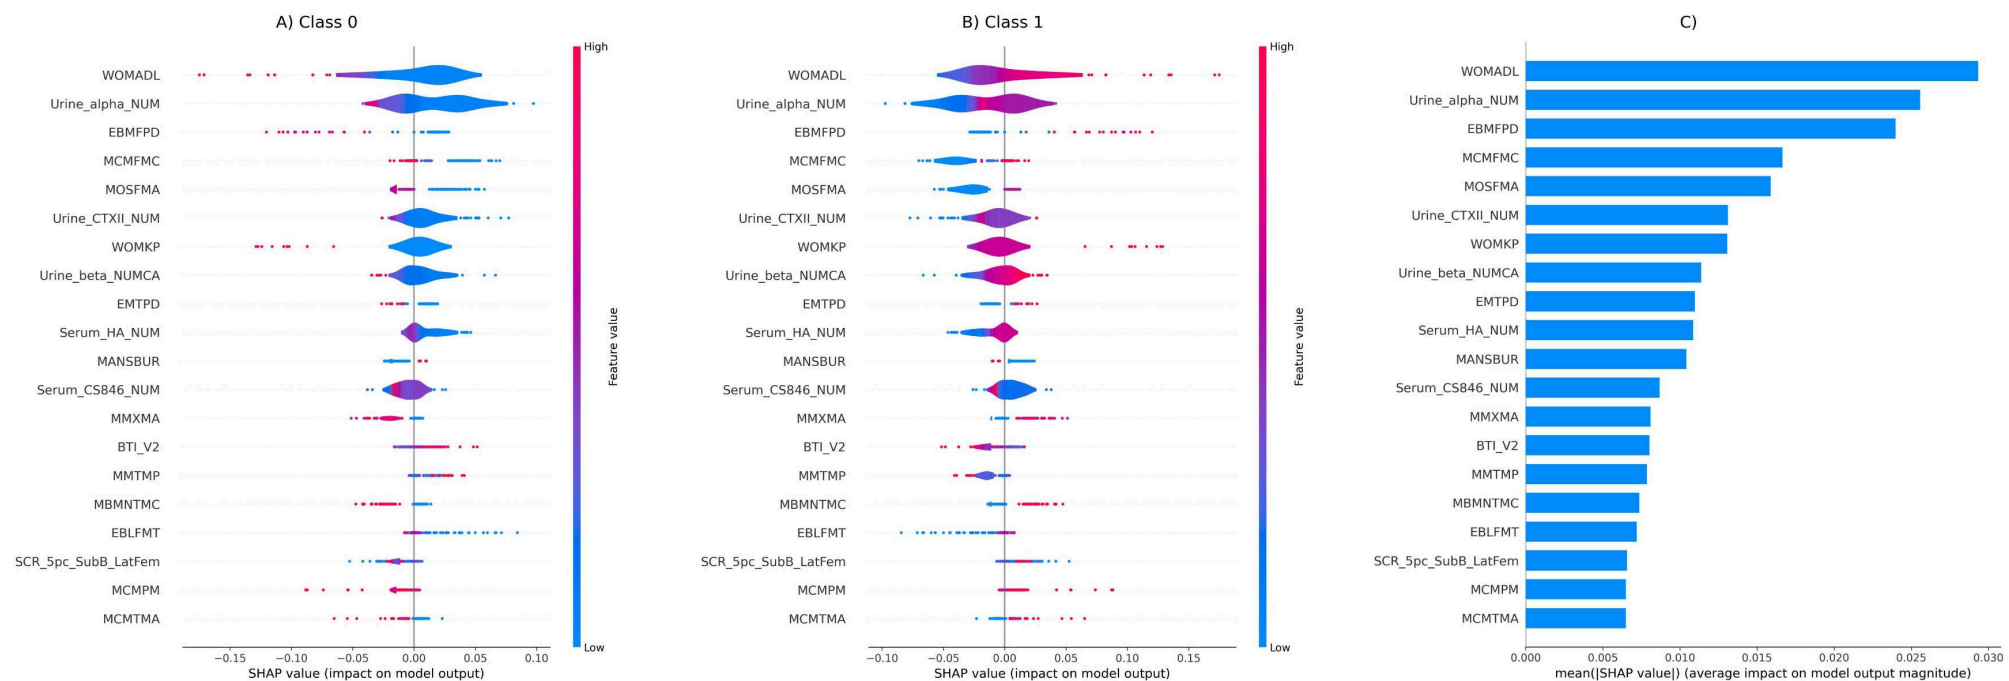

Supplement: inline-supplementary-material-22 [file inline-supplementary-material-22.pdf]
